# Supplementary material for: Maximizing efficiency of genomic selection in CIMMYT’s tropical maize breeding program
Source: PubMed Central journal article supplement (PMC7813723; doi:10.1007/s00122-020-03696-9), 2020-10-10
Supplement: 122_2020_3696_MOESM1_ESM.pdf [file 122_2020_3696_MOESM1_ESM.pdf]

Online Resources 1: Pedigree and size of 13 biparental doubled-haploid families in 2017

| Population | Size | Parent1                             | Parent2                              |
|------------|------|-------------------------------------|--------------------------------------|
| pop1       | 30   | CML440                              | La Posta Seq C7-F64-2-6-2-2-B-B      |
| pop2       | 87   | CML445                              | La Posta Seq C7-F64-2-6-2-2-B-B      |
| pop3       | 83   | CML444                              | La Posta Seq C7-F64-2-6-2-2-B-B      |
| pop4       | 91   | CML312                              | La Posta Seq C7-F64-2-6-2-2-B-B      |
| pop5       | 108  | CML442                              | La Posta Seq C7-F64-2-6-2-2-B-B      |
| pop6       | 68   | CML505                              | La Posta Seq C7-F64-2-6-2-2-B-B      |
| pop7       | 44   | CZL04003                            | La Posta Seq C7-F64-2-6-2-2-B-B      |
| pop8       | 88   | CML536                              | La Posta Seq C7-F64-2-6-2-2-B-B      |
| pop9       | 53   | CML537                              | La Posta Seq C7-F64-2-6-2-2-B-B      |
| pop10      | 37   | CML538                              | La Posta Seq C7-F64-2-6-2-2-B-B      |
| pop11      | 31   | INTA-F2-192-2-1-1-1-<br>B*7-3-B-B   | La Posta Seq C7-F64-2-6-2-2-B-B      |
| pop12      | 66   | ZEWA1F2-134-4-1-B-<br>1-B*4-1-2-B-B | La Posta Seq C7-F64-2-6-2-2-B-B      |
| pop13      | 63   | CML312                              | INTA-F2-192-2-1-1-1-B*7-2-B-10-B-B-B |

Online Resources 2: Pedigree and size of 45 biparental doubled-haploid families in 2018

| Population | Size | Parent1                          | Parent2                                     |
|------------|------|----------------------------------|---------------------------------------------|
| pop1       | 24   | CKDHL0159                        | CML202                                      |
| pop2       | 39   | CKDHL0221                        | CKDHL120312                                 |
| pop3       | 84   | CKDHL0228                        | CKDHL120312                                 |
| pop4       | 47   | CKDHL120143                      | CKDHL120312                                 |
| pop5       | 60   | CKDHL120143                      | CKDHL121167                                 |
| pop6       | 45   | CKDHL120184                      | CKDHL120312                                 |
| pop7       | 43   | CKDHL120312                      | CKDHL0214                                   |
| pop8       | 39   | CKDHL120312                      | CKDHL121167                                 |
| pop9       | 20   | CKDHL120312                      | CML312                                      |
| pop10      | 53   | CKDHL120312                      | CML464                                      |
| pop11      | 16   | CML144                           | CML202                                      |
| pop12      | 27   | CML202                           | CKDHL0089                                   |
| pop13      | 27   | CML202                           | CKDHL121167                                 |
| pop14      | 31   | CML202                           | CKL05003                                    |
| pop15      | 39   | CML206                           | CML464                                      |
| pop16      | 27   | CML322                           | CML202                                      |
| pop17      | 46   | CML463                           | CKDHL120312                                 |
| pop18      | 44   | CML463                           | CML536                                      |
| pop19      | 91   | CML536                           | CKDHL120312                                 |
| pop20      | 9    | CML540                           | ZEWA <sub>c</sub> 2F2-183-2-<br>BBB-B-B-B-B |
| pop21      | 10   | CML545                           | CML540                                      |
| pop22      | 14   | ZEWA <sub>c</sub> 1F2-134-4-1-B* | PHG29                                       |

---

|       |    |                                                                                  |                                   |
|-------|----|----------------------------------------------------------------------------------|-----------------------------------|
| pop23 | 19 | ZEWA <sub>c</sub> 1F2-300-2-2-B*                                                 | LH119                             |
| pop24 | 9  | ZEWA <sub>c</sub> 1F2-300-2-2-B*                                                 | LH51                              |
| pop25 | 10 | ZEWA <sub>c</sub> 1F2-300-2-2-B*                                                 | PHG29                             |
| pop26 | 3  | [(CML395/CML444)-B-4-1-3-1-<br>B/CML395//DTPWC8F31-1-1-2-2]-5-1-2-<br>2-BB-B-B-B | CML507                            |
| pop27 | 40 | 2369/CML536                                                                      | CML539                            |
| pop28 | 36 | CML509                                                                           | CML312                            |
| pop29 | 27 | LH123HT/CML539                                                                   | CML539                            |
| pop30 | 45 | PB80/CML536                                                                      | CML539                            |
| pop31 | 48 | (PHW52/[MSRXG9]C1F2-205-<br>1(OSU23i)-5-3-X-X-1-BBB-1-B*7                        | CML539                            |
| pop32 | 31 | RS_CKSBL10004                                                                    | CML442                            |
| pop33 | 6  | RS_CKSBL10020                                                                    | CML444                            |
| pop34 | 6  | RS_CML395                                                                        | CZL00003                          |
| pop35 | 11 | RS_CML444                                                                        | CKSPL10073                        |
| pop36 | 10 | RS_CML444                                                                        | CZL03014 <sup>+</sup>             |
| pop37 | 49 | TZMI711                                                                          | CML539                            |
| pop38 | 44 | ZEWA <sub>c</sub> 2F2-152-1-BBB-B-B-B-B                                          | CML540                            |
| pop39 | 46 | ZEWA <sub>c</sub> 2F2-183-2-BBB-B-B                                              | 00SADVEA-#-28-1-2-<br>1-1-1-2-3-B |
| pop40 | 60 | PHG39/CML539                                                                     | CML539                            |
| pop41 | 1  | CKDHL121167                                                                      | CML464                            |
| pop42 | 1  | CKSBL10004                                                                       | NA                                |
| pop43 | 1  | CML312                                                                           | NA                                |
| pop44 | 1  | CML395                                                                           | NA                                |
| pop45 | 1  | CML442                                                                           | NA                                |

---

+ the same as CML539



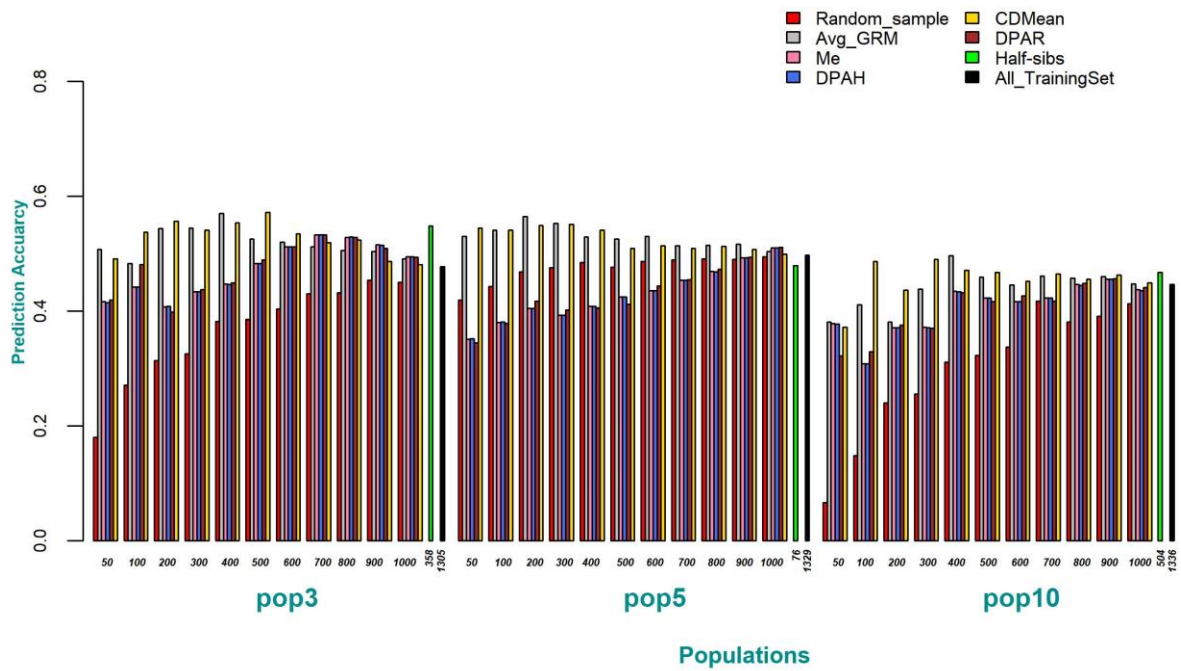

Online Resources 3A: Prediction accuracy of several training set size optimized using different optimization criteria compared to random sampling of the training set and use of all the populations (MBP) as training set

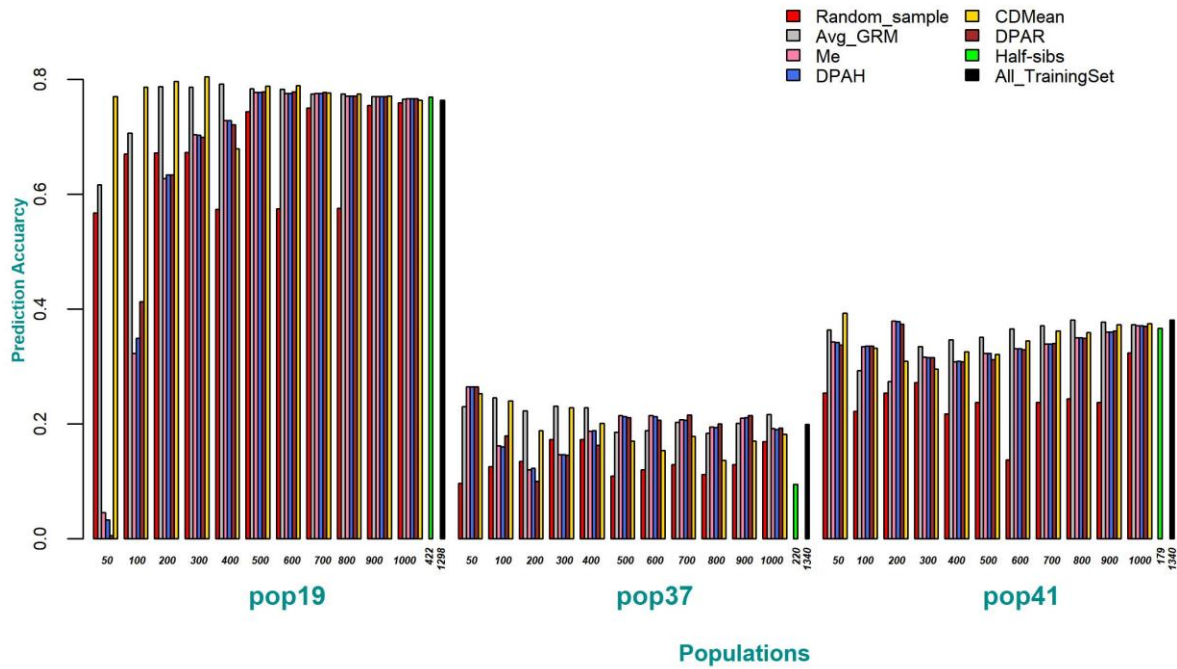

Online Resources 3B: Prediction accuracy of several training set size optimized using different optimization criteria compared to random sampling of the training set and use of all the populations (MBP) as training set
